1 **P5A-ATPases control the ER translocation of Wnt for neuronal migration**

2

3 Tingting Li<sup>1,2,3</sup>, Xiaoyan Yang<sup>1,2,3</sup>, Zhigang Feng<sup>1</sup>, Wang Nie<sup>1,2,3</sup>, Yan Zou<sup>1,2,4,\*</sup>

4

5 <sup>1</sup>School of Life Science and Technology, ShanghaiTech University, Shanghai, 201210,  
6 China

7 <sup>2</sup>Institute of Neuroscience, State Key Laboratory of Neuroscience, CAS Center for  
8 Excellence in Brain Science and Intelligence Technology, Shanghai Institutes for  
9 Biological Sciences, Chinese Academy of Sciences, Shanghai, 200031, China

10 <sup>3</sup>University of Chinese Academy of Sciences, Beijing 100049, China

11 <sup>4</sup>Lead Contact

12 \*Correspondence: [zouyan@shanghaitech.edu.cn](mailto:zouyan@shanghaitech.edu.cn)

13

14

15 **Key words:** P5A-ATPase, Wnt signaling, neuronal migration, *C. elegans*.

16

17 **Abstract**

18 Wnt family are conserved secreted proteins required for developmental patterning and  
19 tissue homeostasis. Research into the mechanisms that influence intracellular  
20 maturation and intercellular signal transduction of Wnt proteins has proved fruitful.  
21 However, the knowledge of how Wnt enters into the endoplasmic reticulum (ER) for  
22 processing and secretion is still limited. Here we report that CATP-8/P5A-ATPase  
23 directs neuronal migration in *C. elegans* by controlling EGL-20/Wnt biogenesis. Our  
24 genetic and biochemical analyses demonstrate that CATP-8 control the ER targeting  
25 of EGL-20/Wnt through the hydrophobic core region in EGL-20 signal sequence. We  
26 further show that regulation of Wnt biogenesis by P5A-ATPase is conserved in human  
27 cells. These findings reveal physiological roles of P5A-ATPase in neuronal  
28 development and identify Wnt proteins as direct substrates of P5A-ATPase to be  
29 translocated into the ER.  
30

## 31 **Introduction**

32 Wnt proteins comprise an evolutionarily conserved morphogen family which plays a  
33 fundamental role in development patterning and tissue homeostasis. Wnt proteins are  
34 secreted from producing cells, triggering a variety responses including cell fate  
35 specification, polarity and migration in target cells. Dysregulations of Wnt signaling  
36 are associated with a variety of developmental deficits and diseases (Clevers, 2006).

37 Wnt family are glycoproteins, forming a globular secondary structure through  
38 intramolecular disulfide bonds among 24 highly conserved cysteines. Functional Wnt  
39 requires multi-layers of posttranslational modifications, such as acylation,  
40 glycosylation and sulfation, which are critical for correct folding and subsequent  
41 secretion (Willert and Nusse, 2012). The journey of Wnt processing, folding and  
42 trafficking starts in the ER. However, upon translation, how Wnt targets to the ER is  
43 largely unknown.

44 Secreted Wnt proteins influence neural connectivity by patterning neuronal  
45 migration, axon guidance, and synapse formation. The Q neuroblasts in *C. elegans*  
46 offer an ideal model to study neuronal migration and Wnt signaling (Chai et al., 2018).  
47 The bilateral Q neuroblast on the left side (QL) and Q neuroblast on the right side  
48 (QR) are born between V4 and V5 seam cells in the posterior worm, on the left and  
49 right sides symmetrically (Sulston and Horvitz, 1977). Although QL and QR undergo  
50 similar cell division processes, they migrate towards opposite directions. QL migrates  
51 posteriorly, differentiating into PQR, PVM and SDQL neurons (Figure 1A and 1B). In  
52 contrast, QR migrates anteriorly, producing AQR, AVM and SDQR neurons. The  
53 migration of Q neuroblasts is activated by EGL-20/Wnt proteins secreted from the  
54 posterior (Coudreuse et al., 2006). Wnt secretion requires endocytosis of  
55 Wnt-transport factor MIG-14/Wls by Retromer complex, as well as proper folding by  
56 protein disulfide isomerase PDI-1 (Coudreuse et al., 2006; Pan et al., 2008; Torpe et  
57 al., 2019; Yang et al., 2008). Binding of EGL-20/Wnt to Frizzled receptors LIN-17  
58 and MIG-1 in the QL cell leads to activation of the canonical Wnt signaling with  
59 BAR-1/ $\beta$ -catenin stabilization and nuclear localization (Harris et al., 1996; Maloof et  
60 al., 1999; Sawa et al., 1996), which induces the transcription of target genes including

61 *mab-5* (Harris et al., 1996; Salser and Kenyon, 1992; Whangbo and Kenyon, 1999).  
62 The transduced signal initiates cytoskeleton rearrangement through WAVE/WASP  
63 coordination and hippo kinase (Feng et al., 2017; Zhu et al., 2016). In addition, Q cell  
64 polarity is regulated by UNC-40/DCC, PTP-3 and MIG-21 to determine its exposure  
65 to EGL-20/Wnt (Honigberg and Kenyon, 2000; Sundararajan and Lundquist, 2012).

66 P-type ATPases comprise a conserved transporter superfamily and can be divided  
67 into five subfamilies: P1- through P5-ATPases. Typical P-type ATPases pump ions  
68 (P1- through P3-ATPases) or lipids (P4-ATPases) across cellular membranes with the  
69 energy of ATP hydrolysis (Palmgren and Nissen, 2011), while substrates of  
70 P5-ATPases had been undefined and speculated to be cations or lipids for a long time  
71 (Sorensen et al., 2015; Sorensen et al., 2019; Suzuki and Shimma, 1999). P5  
72 subfamily consists of two subgroups: P5A-ATPase and P5B-ATPase. Recently,  
73 several studies provide insights into the substrates and gating mechanisms of  
74 P5-ATPases. Veen et al. demonstrated that ATP13A2, a human P5B-ATPase ortholog,  
75 transports lysosomal polyamine into the cytosol (van Veen et al., 2020). Next, we  
76 demonstrated that CATP-8/P5A-ATPase regulates dendrite branching by controlling  
77 the ER translocation of DMA-1 receptor in *C. elegans* (Feng et al., 2020). Another  
78 two papers reported that P5A-ATPases safeguard ER integrity by removing  
79 mislocalized mitochondria tail-anchored (TA) proteins from the ER (McKenna et al.,  
80 2020; Qin et al., 2020). These findings suggest that P5-ATPases diverse from other  
81 P-type subfamilies and have much larger substrates like polyamines for P5B or  
82 polypeptides for P5A.

83 Expression of P5A-ATPase is abundant in mouse brain with the highest  
84 expression coinciding with the peak of neurogenesis (Weingarten et al., 2012).  
85 Moreover, human genetic analysis revealed that mutation in P5A-ATPase is  
86 associated with intellectual disability, attention deficit hyperactivity disorder (ADHD)  
87 and a host of developmental malformations and defects (Anazi et al., 2017). Despite  
88 the implication of P5A-ATPase in neural development, most studies on P5A-ATPase  
89 are carried out in yeast or cell culture. Only our previous work and Qin et al. have  
90 reported that dendrite branching in *C. elegans* requires P5A-ATPase to control the

91 biogenesis of DMA-1 guidance receptor (Feng et al., 2020; Qin et al., 2020). However,  
92 DMA-1 is not very conservative to its ortholog in mammals. Therefore, physiological  
93 functions of P5A-ATPase in metazoans, particularly in nervous system, remain to be  
94 elucidated.

95 Here, we report that CATP-8/P5A-ATPase patterns neuronal migration in *C.*  
96 *elegans*. Our genetic and biochemical analyses reveal that that CATP-8 acts in  
97 Wnt-producing cells to control the ER translocation of EGL-20/Wnt. Interestingly, the  
98 hydrophobicity of core region in signal sequences determine the translocation  
99 dependency on P5A-ATPase. We further demonstrate that P5A-ATPase directly  
100 controls Wnt biogenesis in human cells in a conserved manner. Collectively, we  
101 identify Wnt as a substrate of P5A-ATPase to be translocated into the ER for secretion  
102 to direct neuronal migration.

103

## 104 **Results**

### 105 **CATP-8/P5A-ATPase Is Required for Neuronal Migration**

106 To understand the physiological roles of P5A-ATPase in nervous system, we carried  
107 out a phenotypic investigation of *catp-8* mutants using multiple neuron-type specific  
108 reporters, and observed severe migration defects of PQR neuron. PQR neurons in  
109 wild-type (WT) animals are next to the anus in the tail (Figure 1B). However, in the  
110 two *catp-8* null alleles (Figure 1D), *catp-8(yan22)* and *catp-8(yan32)*, a majority of  
111 PQR neurons locate near the anterior deirid in the head (Figure 1C and 1E).

112 Transgenic expression of *catp-8* driven by endogenous promoter fully rescued PQR  
113 migration defects in *catp-8* mutants (Figure 1F), suggesting *catp-8* is required for  
114 PQR posterior localization.

115 As stated above, PQR are differentiated from QL neuroblast, accompanied by  
116 two other QL descendent cells, PVM and SDQL (Figure 1A). To explore whether  
117 migration of the whole QL lineage is affected by *catp-8* mutation, we also examined  
118 PVM and SDQL neurons. Similar as PQR neurons, both PVM and SDQL neurons  
119 migrate more anteriorly in *catp-8* mutants than in WT worms (Figure S1). We thus  
120 hypothesized that *catp-8* mutation impairs early direction of the whole QL lineage. To

121 test this idea, we perform time-lapse imaging on the developing Q neuroblasts in live  
122 animals. As shown in Figure 1G, the first division descendants of QL neuroblast, QL.a  
123 and QL.p cells, already made an opposite migration decision toward the anterior in  
124 *catp-8* mutants, whereas their counterparts in WT animals protrude toward the  
125 posterior. Taken together, our results suggest that *catp-8* is required to direct QL  
126 posterior migration.

127

### 128 ***catp-8* Acts in the Canonical Wnt Pathway to control QL migration**

129 The asymmetric migration of QL and QR neuroblasts are determined by whether the  
130 transcription of the Hox gene *mab-5* is intrinsically activated. The *mab-5*-expressing  
131 QL descendants migrate posteriorly, whereas lack of *mab-5* expression in the QR  
132 progeny results in anteriorly directed migration (Salser and Kenyon, 1992). In *mab-5*  
133 loss-of-function (*lf*) mutants, both QL and QR descendants migrate toward the  
134 anterior. On the contrary, in *mab-5* gain-of-function (*gf*) mutant, which ectopically  
135 expresses *mab-5* in both QL and QR lineages, all their progeny cells migrate toward  
136 the posterior (Salser and Kenyon, 1992). To uncover the genetic program underlying  
137 *catp-8* involved neuronal migration, we first tested the epistatic interaction between  
138 *mab-5* and *catp-8*. We found that *mab-5(lf);catp-8(yan22)* double mutants display  
139 similar QL migration defects to *mab-5(lf)* single mutants, while *mab-5(gf)* completely  
140 suppresses QL migration defects caused by *catp-8(yan22)* (Figure 2B), suggesting  
141 that *catp-8* acts upstream of *mab-5*. Then we assessed whether *mab-5* is properly  
142 expressed in *catp-8* mutants using a *Pmab-5::GFP* reporter. Interestingly, *mab-5*  
143 expression is lost in anteriorly-localized PQR cells in *catp-8* mutants, while  
144 posteriorly-localized PQR cells in *catp-8* mutants still retain *mab-5* expression (Figure  
145 2C). Therefore, defective PQR migration in *catp-8* mutants is likely due to *mab-5*  
146 activation failure.

147 The *mab-5*-dependent QL migration is activated by a canonical Wnt pathway  
148 (Harris et al., 1996). Wnt ligand EGL-20 is perceived by Frizzled receptors LIN-17  
149 and MIG-1 in the QL cell, then transduced by MIG-5/Dishevelled to release  
150 BAR-1/ $\beta$ -catenin from inhibition by PRY-1/Axin. Stabilized  $\beta$ -catenin is thus

151 translocated to the nucleus where it initiates the expression of many genes including  
152 *mab-5* (Figure 2A). To investigate whether *catp-8* acts through the canonical Wnt  
153 pathway to control QL migration, we tested the genetic interactions between *catp-8*  
154 and those key factors. We found that *catp-8* mutation enhanced QL migration defect  
155 in Frizzled receptor mutant *lin-17* or *mig-1*, while had no effect on the defects in  
156 *mig-5*/Dishevelled and *bar-1*/ $\beta$ -catenin mutation (Figure 2D). Notably, mutation of  
157 *pry-1*/Axin, the negative-acting factor in this pathway, suppressed defective anterior  
158 displacement of QL in *catp-8* mutants (Figure 2D). Taken together, we concluded that  
159 *catp-8* acts upstream of *pry-1* in the canonical Wnt pathway for QL migration.

160 To determine the role of *catp-8* in the canonical Wnt pathway, we further  
161 explored the genetic interactions between *catp-8* and known factors involved in  
162 EGL-20/Wnt biogenesis. As shown in Figure 2E, *catp-8* enhanced QL defective  
163 migration in anterior positions in *mig-14*/Wls and *vps-29*/Retromer but not in  
164 *egl-20*/Wnt mutants, further supporting that *catp-8* and *egl-20* act in the same pathway.  
165 Moreover, epistatic analysis suggests that *catp-8* functions upstream of *egl-20* since  
166 overexpression of *egl-20* fully rescued QL migration defects in *catp-8* (Figure 2E).

167

### 168 ***catp-8* Acts Cell-Non-Autonomously from Wnt-Producing Cells to Control** 169 **Neuronal Migration**

170 On the basis of our genetic results, we proposed that *catp-8* likely acts  
171 cell-non-autonomously in the Wnt-producing cells to control QL migration. Hence,  
172 we investigated the expression pattern of *catp-8* using an N-terminal *gfp* knock-in  
173 strain *catp-8(yan27 ki[gfp::*catp-8*])*. However, we found *catp-8* expressed  
174 ubiquitously in both PQR neuron and its surrounding hypodermis from which  
175 EGL-20/Wnt is secreted (Figure 3A). To determine cell-autonomous requirement of  
176 *catp-8*, we then used *egl-20* promoter or *egl-17* promoter to drive *catp-8* expression  
177 specifically in Wnt-producing cells or in QL descendants. To our surprise, *catp-8*  
178 overexpression driven by either *egl-20* or *egl-17* promoter was able to rescue the QL  
179 migration defects in *catp-8* mutants (Figure 3B). Then we tried *spon-1* promoter  
180 (Josephson et al., 2016), which is also expressed in Wnt-producing cells and gives

181 similar result as *egl-20* promoter (Figure 3B). However, when we examined the  
182 expression pattern of *egl-17* promoter carefully, we found that it has a weak but  
183 broader expression in PQR neighboring cells (Figure 3A). Therefore, rescue of *catp-8*  
184 driven by *egl-17* promoter may be attributed to the expression outside of PQR and is  
185 not conclusive. To obtain exclusive expression of *catp-8* in QL descendants, we  
186 designed a binary expression system combining *Pegl-17::Cre* and  
187 *Ptoe-2::loxp::stop::loxp::gfp::catp-8* (Figure 3C). The overlap of *toe-2* (Gurling et al.,  
188 2014) promoter and *egl-17* promoter provides a more restricted expression of *catp-8*  
189 in QL descendants (Figure 3D), which could not rescue the QL migration defects  
190 caused by *catp-8* (Figure 3E). Altogether, our results suggest a cell-non-autonomous  
191 role of *catp-8* in QL migration.

192

### 193 ***catp-8* controls ER translocation of EGL-20/Wnt through EGL-20 Signal**

#### 194 **Sequence**

195 Since *catp-8* acts upstream of *egl-20*/Wnt in the EGL-20 producing cells, we next  
196 asked whether *catp-8* regulates *egl-20*/Wnt. Using an integrated  
197 *Pegl-20::egl-20::GFP* reporter, we found that *catp-8* depletion significantly reduced  
198 EGL-20::GFP level, while re-expression of *catp-8* restored EGL-20::GFP intensity  
199 (Figure 4A). Western blot of confirmed reduction of EGL-20::GFP in *catp-8* mutants  
200 (Figure 4D). In contrast, mRNA levels of *egl-20* measured by real-time RT-PCR were  
201 similar in both WT and *catp-8* (Figure 4E). Therefore, we conclude that *catp-8*  
202 regulates EGL-20 at protein level.

203 Previous study showed that CATP-8 is required for the ER translocation of  
204 DMA-1 receptor for dendrite branching in a signal sequence dependent manner (Feng  
205 et al., 2020). Since upon translation, Wnt proteins translocate into the ER to be  
206 intracellular processed and sorted for secretion (Willert and Nusse, 2012), we  
207 wondered whether CATP-8 controls the ER translocation of EGL-20/Wnt through  
208 EGL-20 signal sequence (EGL-20SS). To test this, we constructed an engineered  
209 protein EGL-20SS::GFP::3\*GLY::FLAG. If this engineered protein is able to  
210 translocate into the ER, the three glycosylation sites (3\*Gly) would become



211 glycosylated and thus generate a larger protein than its calculated molecular weight.  
212 As expected, this EGL-20SS guided protein entered into the ER in WT but failed in  
213 *catp-8* mutants (Figure 4B), suggesting that its translocation is dependent on CATP-8.  
214 To confirm the requirement of EGL-20SS for CATP-8 regulated EGL-20 biogenesis,  
215 we utilized CRISPR-Cas9 to replace the endogenous EGL-20SS with a previously  
216 described CATP-8 independent signal sequence, PAT-3SS (Feng et al., 2020). Indeed,  
217 PAT-3SS knock-in at *egl-20* locus rescued QL migration in *catp-8* mutants (Figure 4C  
218 and 4F). Collectively, our data demonstrated that CATP-8 controls EGL-20/Wnt  
219 biogenesis through the recognition of specific signal sequence.

220 Signal sequences generally comprise characteristic tripartite architecture: a  
221 positive-charged N-terminal region, a hydrophobic core region and a C-terminal  
222 cleavage site by signal peptidases (Owji et al., 2018). Since both EGL-20SS and  
223 PAT-3SS only contain no-charged residues (Figure 4G), we wonder whether  
224 hydrophobicity is the key factor for CATP-8-dependent translocation. Hence, we  
225 mutated EGL-20SS and PAT-3SS by increasing their hydrophobicity in the core  
226 region (Figure 4G), and then assessed their translocation efficiency in  
227 *ATP13A1*/P5A-ATPase knock out (KO) HEK293FT cells. We found that  
228 EGL-20SS(M) displayed higher dependence on ATP13A1 than EGL-20SS.  
229 Intriguingly, increased hydrophobicity turned PAT-3SS(M) to rely on ATP13A1  
230 completely (Figure 4H). Taken together, these results suggest that P5A-ATPase likely  
231 recognizes certain signal sequences by the high hydrophobicity in the core region.

232

### 233 **P5A ATPases Directly Control Wnt Biogenesis in a Conserved Manner**

234 Since both P5A ATPase and Wnt proteins are present in higher organisms, we next  
235 asked whether the regulation of EGL-20/Wnt biogenesis by CATP-8 in *C. elegans* is  
236 evolutionarily conserved in mammals. To test this, we transfected human WNT1 in  
237 both WT and *ATP13A1* KO cells and found WNT1 protein level are dramatically  
238 reduced in *ATP13A1* KO cells (Figure 5A). Moreover, similar to the observation in *C.*  
239 *elegans*, Wnt1 signal sequence (Wnt1SS) is essential for the *ATP13A1*-dependent  
240 WNT1 biogenesis (Figure 5B). These results reveal the functional conservation of

241 P5A-ATPases in regulating ER translocation of Wnt proteins.

242 We next sought to determine whether Wnt1 is a direct substrate to be  
243 translocated by ATP13A1. As translocation is a very transient process, it is difficult to  
244 capture the interactions by co-immunoprecipitation. We thus employed PUP-IT  
245 proximal labeling system (Liu et al., 2018) to detect whether there are physical  
246 interactions between ATP13A1 and WNT1. We transfected ATP13A1 fused with the  
247 proximity ligase PafA as a bait and either WNT1SS or PAT-3SS as a prey. If Wnt1SS  
248 is the substrate of ATP13A1, we expected that PafA-ATP13A1 catalyzes the ligation  
249 of a small protein Biotin-PupE to Wnt1SS guided protein. Indeed, WNT1SS but not  
250 PAT-3SS guided protein was labeled with Biotin-PupE by PafA-ATP13A1 (Figure  
251 5C), suggesting a direct and specific control of WNT1 translocation by ATP13A1.

252

## 253 **Discussion**

254 In this study, we identified CATP-8/P5A-ATPase as a key factor to direct neuronal  
255 migrations through regulating EGL-20/Wnt biogenesis. Our genetic and biochemical  
256 analyses demonstrate that CATP-8/P5A-ATPase controls the ER translocation of  
257 EGL-20/Wnt by specifically recognizing the hydrophobic core region in signal  
258 sequences. Moreover, the effect of P5A-ATPase on Wnt biogenesis is recapitulated in  
259 human cells, implying a conserved role of P5A-ATPase on Wnt-mediated  
260 developmental events.

261 Although numerous studies have been focused on Wnt trafficking and signal  
262 transduction, it is still not clear how Wnt enters into the ER for subsequent processing  
263 and secretion. Wnt family harbor hydrophobic signal sequences at the N-terminus,  
264 which are hallmarks for secreted proteins. Therefore, the signal sequence guided ER  
265 translocation of Wnt was speculated to be similar to other secreted proteins. However,  
266 our results demonstrate that P5A-ATPase is specifically required for the ER  
267 translocation of certain transmembrane (TM) proteins like DMA-1 (Feng et al., 2020)  
268 and secreted proteins like Wnt. P5A-ATPase emerges in the eukaryotes and gains  
269 distinct capacity for larger substrates like polypeptides (Feng et al., 2020; McKenna et  
270 al., 2020; Qin et al., 2020). Interestingly, putative substrates of P5A-ATPase in

271 metazoans, Wnt and DMA-1, are important for cell-cell communications and have  
272 large biosynthesis demands in relatively short developmental critical windows, which  
273 might be an extra burden for their producing cells. For example, EGL-20/Wnt is  
274 secreted from several cells in the worm tail and forms a gradient to pattern multiple  
275 early developmental events. DMA-1 is synthesized by two tiny PVD neurons and  
276 trafficked onto huge dendritic arborizations covering the whole worm body to  
277 perceive guidance cues from hypodermis (Dong et al., 2013; Liu and Shen, 2011). An  
278 interesting view is that P5A-ATPase may function as a freeway to the ER for high  
279 demanding proteins to be efficiently translocated, or to prevent the jam by heavy  
280 protein load to the essential translocon Sec61.

281 Intriguingly, different substrates of P5A-ATPase are likely transported in  
282 opposite directions. First, our studies demonstrate that P5A-ATPase directly controls  
283 the translocation from the cytosol to the ER of certain proteins with highly  
284 hydrophobic N-terminal signal sequences. Second, McKenna and Qin et al. show that  
285 P5A-ATPase functions as a dislocase to remove mistargeted mitochondria TA proteins  
286 from the ER to the cytosol (McKenna et al., 2020; Qin et al., 2020). McKenna et al.  
287 speculated that proteins with N-terminal signal sequences are generally less  
288 hydrophobic and often have positive-charged N-termini than TM, which might lead to  
289 their ER insertion in a wrong topology. They proposed that P5A-ATPase might also  
290 remove these wrong topological proteins from the ER, providing additional  
291 opportunities for correct ER targeting (McKenna et al., 2020). However, estimated  
292 from our data in Figure 4B, the vast majority of EGL-20 translocation is dependent on  
293 CATP-8. In this sense, CATP-8 has to remove wrong targeting EGL-20 repeatedly,  
294 which is inefficient and at high cost. Therefore, the mechanistic basis how  
295 P5A-ATPase recognizes different substrates and thus transports them in the opposite  
296 directions requires further study. The substrate specificity of P5A-ATPase might come  
297 from high hydrophobicity of signal sequences, as enhancement of hydrophobicity  
298 increases their translocation dependence on P5A-ATPase.

299 Directed neuronal migration is critical for the development of functional nervous  
300 system. We identified Wnt proteins as direct substrates of P5A-ATPases in neuronal

301 patterning, which may explain the observation that ATP13A1 mutation in human is  
302 associated with neurodevelopmental disorders (Anazi et al., 2017). Considering  
303 ubiquitous expressions and pleiotropic phenotypes of P5A-ATPase (Anazi et al., 2017;  
304 Feng et al., 2020; Qin et al., 2020; Sorensen et al., 2015; Weingarten et al., 2012),  
305 there are more clients of P5A-ATPase in other cellular contexts yet to be identified for  
306 better understanding of the physiological roles of P5A-ATPase in metazoans.

307

### 308 **ACKNOWLEDGEMENTS**

309 We thank Drs. Zhiyong Shao and Yingchuan Qi for reagents. We thank Drs.  
310 Yingchuan Qi, Huanhu Zhu, and Xiajing Tong for helpful discussions. We thank the  
311 Molecular Imaging Core Facility (MICF) at ShanghaiTech University for assistance  
312 on confocal microscopy. Some strains were provided by the CGC, which is funded by  
313 NIH Office of Research Infrastructure Programs (P40 OD010440). This study was  
314 supported by the National Natural Science Foundation of China (No.31571047) and  
315 the Start-up grant from ShanghaiTech University.

316

### 317 **AUTHOR CONTRIBUTIONS**

318 Conceptualization, T.L., Z.F. and Y.Z.; Investigation, T.L., Z.F., X.Y., W.N. and Y.Z.;  
319 Writing – Original Draft, Y.Z. and T.L.; Writing – Review & Editing, Y.Z.; Funding  
320 Acquisition, Y.Z.; Supervision, Y.Z.

321

### 322 **DECLARATION OF INTERESTS**

323 The authors declare no competing interests.

324

### 325 **REFERENCES**

- 326 Anazi, S., Maddirevula, S., Salpietro, V., Asi, Y.T., Alsahli, S., Alhashem, A., Shamseldin, H.E.,  
327 AlZahrani, F., Patel, N., Ibrahim, N., *et al.* (2017). Expanding the genetic heterogeneity of intellectual  
328 disability. *Hum Genet* 136, 1419-1429.
- 329 Brenner, S. (1974). The genetics of *Caenorhabditis elegans*. *Genetics* 77, 71-94.
- 330 Chai, Y., Zhu, Z., and Ou, G. (2018). Migration of Q Cells in *Caenorhabditis elegans*. *Methods Mol*  
331 *Biol* 1749, 239-255.
- 332 Clevers, H. (2006). Wnt/beta-catenin signaling in development and disease. *Cell* 127, 469-480.

- 333 Coudreuse, D.Y.M., Roel, G., Betist, M.C., Destree, O., and Korswagen, H.C. (2006). Wnt gradient  
334 formation requires retromer function in Wnt-producing cells. *Science* *312*, 921-924.
- 335 Dickinson, D.J., Ward, J.D., Reiner, D.J., and Goldstein, B. (2013). Engineering the *Caenorhabditis*  
336 *elegans* genome using Cas9-triggered homologous recombination. *Nat Methods* *10*, 1028-1034.
- 337 Dong, X., Liu, O.W., Howell, A.S., and Shen, K. (2013). An extracellular adhesion molecule complex  
338 patterns dendritic branching and morphogenesis. *Cell* *155*, 296-307.
- 339 Eisenmann, D.M. (2005). Wnt signaling. *WormBook*.
- 340 Feng, G., Zhu, Z., Li, W.J., Lin, Q., Chai, Y., Dong, M.Q., and Ou, G. (2017). Hippo kinases maintain  
341 polarity during directional cell migration in *Caenorhabditis elegans*. *EMBO J* *36*, 334-345.
- 342 Feng, Z.G., Zhao, Y.P., Li, T.T., Nie, W., Yang, X.Y., Wang, X.J., Wu, J.G., Liao, J., and Zou, Y. (2020).  
343 CATP-8/P5A ATPase Regulates ER Processing of the DMA-1 Receptor for Dendritic Branching. *Cell*  
344 *Rep* *32*.
- 345 Gurling, M., Talavera, K., and Garriga, G. (2014). The DEP domain-containing protein TOE-2  
346 promotes apoptosis in the Q lineage of *C. elegans* through two distinct mechanisms. *Development* *141*,  
347 *2724-2734*.
- 348 Harris, J., Honigberg, L., Robinson, N., and Kenyon, C. (1996). Neuronal cell migration in *C. elegans*:  
349 regulation of Hox gene expression and cell position. *Development* *122*, 3117-3131.
- 350 Honigberg, L., and Kenyon, C. (2000). Establishment of left/right asymmetry in neuroblast migration  
351 by UNC-40/DCC, UNC-73/Trio and DPY-19 proteins in *C.elegans*. *Development* *127*, 4655-4668.
- 352 Josephson, M.P., Miltner, A.M., and Lundquist, E.A. (2016). Nonautonomous Roles of MAB-5/Hox  
353 and the Secreted Basement Membrane Molecule SPON-1/F-Spondin in *Caenorhabditis elegans*  
354 Neuronal Migration. *Genetics* *203*, 1747-1762.
- 355 Judith Buentzel, S.T. (2017). The Use of Glycosylation Tags as Reporters for Protein Entry into the  
356 Endoplasmic Reticulum in Yeast and Mammalian Cells. In: Schrader M. (eds) Peroxisomes., Vol 1595  
357 (Humana Press, New York, NY).
- 358 Liu, O.W., and Shen, K. (2011). The transmembrane LRR protein DMA-1 promotes dendrite branching  
359 and growth in *C. elegans*. *Nat Neurosci* *15*, 57-63.
- 360 Liu, Q., Zheng, J., Sun, W.P., Huo, Y.B., Zhang, L.Y., Hao, P.L., Wang, H.P., and Zhuang, M. (2018). A  
361 proximity-tagging system to identify membrane protein-protein interactions. *Nat Methods* *15*, 715-+.
- 362 Maloof, J.N., Whangbo, J., Harris, J.M., Jongeward, G.D., and Kenyon, C. (1999). A Wnt signaling  
363 pathway controls Hox gene expression and neuroblast migration in *C-elegans*. *Development* *126*,  
364 *37-49*.
- 365 McKenna, M.J., Sim, S.I., Ordureau, A., Wei, L., Harper, J.W., Shao, S., and Park, E. (2020). The  
366 endoplasmic reticulum P5A-ATPase is a transmembrane helix dislocase. *Science* *369*.
- 367 Mello, C., and Fire, A. (1995). DNA transformation. *Method Cell Biol* *48*, 451-482.
- 368 Owji, H., Nezafat, N., Negahdaripour, M., Hajiebrahimi, A., and Ghasemi, Y. (2018). A comprehensive  
369 review of signal peptides: Structure, roles, and applications. *Eur J Cell Biol* *97*, 422-441.
- 370 Palmgren, M.G., and Nissen, P. (2011). P-Type ATPases. *Annu Rev Biophys* *40*, 243-266.
- 371 Pan, C.L., Baum, P.D., Gu, M., Jorgensen, E.M., Clark, S.G., and Garriga, G. (2008). *C. elegans* AP-2  
372 and retromer control Wnt signaling by regulating mig-14/Wntless. *Dev Cell* *14*, 132-139.
- 373 Qin, Q., Zhao, T., Zou, W., Shen, K., and Wang, X. (2020). An Endoplasmic Reticulum ATPase  
374 Safeguards Endoplasmic Reticulum Identity by Removing Ectopically Localized Mitochondrial  
375 Proteins. *Cell Rep* *33*, 108363.
- 376 Salser, S.J., and Kenyon, C. (1992). Activation of a *C-Elegans* Antennapedia Homolog in Migrating

377 Cells Controls Their Direction of Migration. *Nature* 355, 255-258.  
378 Sawa, H., Lobel, L., and Horvitz, H.R. (1996). The *Caenorhabditis elegans* gene *lin-17*, which is  
379 required for certain asymmetric cell divisions, encodes a putative protein similar to  
380 seven-transmembrane protein similar to the *Drosophila* Frizzles protein. *Gene Dev* 10, 2189-2197.  
381 Sorensen, D.M., Holen, H.W., Holemans, T., Vangheluwe, P., and Palmgren, M.G. (2015). Towards  
382 defining the substrate of orphan P5A-ATPases. *Bba-Gen Subjects* 1850, 524-535.  
383 Sorensen, D.M., Holen, H.W., Pedersen, J.T., Martens, H.J., Silvestro, D., Stanchev, L.D., Costa, S.R.,  
384 Pomorski, T.G., Lopez-Marques, R.L., and Palmgren, M. (2019). The P5A ATPase Spf1p is stimulated  
385 by phosphatidylinositol 4-phosphate and influences cellular sterol homeostasis. *Molecular Biology of*  
386 *the Cell* 30, 1069-1084.  
387 Sulston, J.E., and Horvitz, H.R. (1977). Post-embryonic cell lineages of the nematode, *Caenorhabditis*  
388 *elegans*. *Dev Biol* 56, 110-156.  
389 Sundararajan, L., and Lundquist, E.A. (2012). Transmembrane Proteins UNC-40/DCC, PTP-3/LAR,  
390 and MIG-21 Control Anterior-Posterior Neuroblast Migration with Left-Right Functional Asymmetry  
391 in *Caenorhabditis elegans*. *Genetics* 192, 1373-+.  
392 Suzuki, C., and Shimma, Y. (1999). P-type ATPase *spf1* mutants show a novel resistance mechanism  
393 for the killer toxin SMKT. *Mol Microbiol* 32, 813-823.  
394 Torpe, N., Gopal, S., Baltaci, O., Rella, L., Handley, A., Korswagen, H.C., and Pocock, R. (2019). A  
395 Protein Disulfide Isomerase Controls Neuronal Migration through Regulation of Wnt Secretion. *Cell*  
396 *Rep* 26, 3183-+.  
397 van Veen, S., Martin, S., Van den Haute, C., Benoy, V., Lyons, J., Vanhoutte, R., Kahler, J.P.,  
398 Decuyper, J.P., Gelders, G., Lambie, E., *et al.* (2020). ATP13A2 deficiency disrupts lysosomal  
399 polyamine export. *Nature* 578, 419-424.  
400 Wang, X., Li, T., Hu, J., Feng, Z., Zhong, R., Nie, W., Yang, X., and Zou, Y. (2021). In vivo imaging of  
401 a PVD neuron in *Caenorhabditis elegans*. *STAR Protoc* 2, 100309.  
402 Weingarten, L.S., Dave, H., Li, H., and Crawford, D.A. (2012). Developmental expression of P5  
403 ATPase mRNA in the mouse. *Cell Mol Biol Lett* 17, 153-170.  
404 Whangbo, J., and Kenyon, C. (1999). A Wnt signaling system that specifies two patterns of cell  
405 migration in *C. elegans*. *Mol Cell* 4, 851-858.  
406 Willert, K., and Nusse, R. (2012). Wnt Proteins. *Csh Perspect Biol* 4.  
407 Yang, P.T., Lorenowicz, M.J., Silhankova, M., Coudreuse, D.Y.M., Betist, M.C., and Korswagen, H.C.  
408 (2008). Wnt signaling requires retromer-dependent recycling of MIG-14/Wntless in Wnt-producing  
409 cells. *Dev Cell* 14, 140-147.  
410 Zhu, Z., Chai, Y., Jiang, Y., Li, W., Hu, H., Li, W., Wu, J.W., Wang, Z.X., Huang, S., and Ou, G. (2016).  
411 Functional Coordination of WAVE and WASP in *C. elegans* Neuroblast Migration. *Dev Cell* 39,  
412 224-238.

413

## 414 **FIGURE LEGEND**

### 415 **Figure 1. *catp-8* Is Required for Neuronal Migration**

416 (A) Schematic depicting QL neuroblast lineage. QL neuroblast undergoes three  
417 rounds of asymmetric divisions to yield two apoptotic cells (yellow circles with X)  
418 and three neurons PQR, PVM, SDQL.

419 (B) Diagram showing cell divisions and migration of QL neuroblast. V1 through V6  
420 depict the positions of six seam cells. Color code is the same as in (A).

421 (C) Representative images of PQR positions in WT, *catp-8(yan22)*, *catp-8(yan32)*,  
422 and *catp-8(yan22)* with a single copy transgene of *yanTi9 [Pcatp-8::catp-8]*. PQR  
423 neurons were visualized by a fluorescent marker *lqls58[gcy-32::cfp]*. Scale bar, 100  
424  $\mu\text{m}$ .

425 (D) Schematic of *catp-8* gene showing molecular lesions of *catp-8(yan22)* and  
426 *catp-8(yan32)* mutants. Arrowhead indicates the position of the point mutation in the  
427 *yan22* allele.

428 (E) Quantifications of PQR positions in (C). Data are presented as mean  $\pm$  SEM. N  
429 numbers are shown in the brackets. \*\*\*\*,  $P < 0.0001$  (One-sided ANOVA with the  
430 Tukey correction).

431 (F) Time-lapse imaging of QL descendant migrations at indicated time points after the  
432 first round of cell division. QL descendants were visualized by a fluorescent marker  
433 *rdvIs1[Pegl-17::Myr-mCherry; Pegl-17::mig-10::YFP;*  
434 *Pegl-17::mCherry-TEV-S::his-24]*. The dashed lines indicate worm positions with  
435 arrowheads pointing to A (Anterior) and P (Posterior) respectively. Scale bar, 10  $\mu\text{m}$ .

436

437 **Figure 2. *catp-8* Acts in the Wnt/ $\beta$ -catenin Pathway to Control PQR Migration.**

438 (A) Schematic diagram of the canonic Wnt/ $\beta$ -catenin pathway required for QL  
439 migration, modified from (Eisenmann, 2005).

440 (B) Quantifications of PQR positions in indicated genotypes, showing that *catp-8* acts  
441 upstream of *mab-5*. Data are presented as mean  $\pm$  SEM. N numbers are shown in the  
442 brackets. \*\*\*\*,  $P < 0.0001$ ; ns, not significant (One-sided ANOVA with the Tukey  
443 correction).

444 (C) Representative images of *mab-5* expression shown by a *Pmab-5::gfp* transgene in  
445 WT and *catp-8* mutants. Diagram showing PQR positions in indicated genotypes.  
446 PQR neurons were visualized using a *Pegl-17::mcherry* fluorescence marker.  
447 Arrowheads point to PQR. Scale bar, 10  $\mu\text{m}$ .

448 (E-F) Quantifications of PQR positions in indicated genotypes, showing that *catp-8*



449 acts in the canonical Wnt pathway. Data are presented as mean  $\pm$  SEM. N numbers are  
450 shown in the brackets. \*\*,  $P < 0.01$ ; \*\*\*,  $P < 0.001$ ; \*\*\*\*,  $P < 0.0001$ ; ns, not significant  
451 (One-sided ANOVA with the Tukey correction).

452

453 **Figure 3. *catp-8* Functions Cell-Non-Autonomously in the Wnt Producing Cells**  
454 **to Direct PQR Migration.**

455 (A) Representative images showing CATP-8 expression in both Wnt producing cells  
456 and Q neuroblast. Green: CATP-8 expression shown by a GFP knocked in the *catp-8*  
457 genomic locus. Red: expression pattern of *egl-20* promoter shown by  
458 *Pegl-20::NLS-mCherry* (top), expression of *egl-17* promoter in PQR and the midline  
459 shown by *rdvIs1* (middle), expression of *egl-17* promoter in QL shown by *rdvIs1*  
460 (bottom).

461 (B) Quantifications of PQR positions in indicated genotypes. Data are presented as  
462 mean  $\pm$  SEM. N numbers are shown in the brackets. \*\*\*\*,  $P < 0.0001$  (One-sided  
463 ANOVA with the Tukey correction).

464 (C) Diagram depicting the constructs of the Cre-dependent binary expression system  
465 used in (D). *Pgene2* refers to either *egl-17* promoter or *egl-20* promoter.

466 (D) Representative images of *catp-8* expressions (Green) by the Cre-dependent binary  
467 expression system. PQR neurons were visualized by a *Pgcy-32::mcherry* transgene.  
468 Scale bar, 10  $\mu$ m.

469 (E) Quantifications of defective PQR migration in indicated genotypes, showing that  
470 overexpressing *catp-8* in Wnt-producing cells but not in PQR rescues PQR migration  
471 defects in *catp-8* mutants. Data are presented as mean  $\pm$  SEM. N numbers are shown  
472 in the brackets. \*\*\*,  $P < 0.001$ ; ns, not significant (One-sided ANOVA with the Tukey  
473 correction).

474

475 **Figure 4. *catp-8* Controls ER translocation of EGL-20/Wnt.**

476 (A) Representative images of *egl-20::GFP* expression in WT, *catp-8(yan22)*, and  
477 *catp-8(yan22)* with a single copy transgene of *yanTi9 [Pcatp-8::catp-8]*. Scale bar, 20  
478  $\mu$ m.



479 (B) Western blot of EGL-20SS-GFP-3\*GLY-FLAG in WT and *catp-8(yan22)*. Bars  
480 indicate quantifications of the glycosylated proteins. Data are presented as mean  $\pm$   
481 SEM. \*\*\*\*,  $P < 0.0001$  (Tukey's multiple comparisons test).  
482 (C) Representative images of PQR positions in WT, *catp-8(yan22)*, and *catp-8(yan22)*  
483 with a PAT-3SS knock-in to replace the endogenous EGL-20SS. PQR neurons were  
484 visualized by a fluorescent marker *lqls58[gcy-32::cfp]*. Scale bar, 100  $\mu$ m.  
485 (D) Western blot showing EGL-20::GFP protein levels in (A). Bars indicate  
486 quantifications of EGL-20::GFP and are presented as mean  $\pm$  SEM. \*,  $P < 0.05$   
487 (Tukey's multiple comparisons test).  
488 (E) Real-time RT-PCR showing mRNA abundance of *egl-20* in WT and *catp-8(yan22)*  
489 mutants. Data are presented as mean  $\pm$  SEM. n.s., not significant (Student's *t* test).  
490 (F) Quantifications of PQR positions in (E). Data are presented as mean  $\pm$  SEM. N  
491 numbers are shown in the brackets. \*\*\*\*,  $P < 0.0001$  (One-sided ANOVA with the  
492 Tukey correction).  
493 (G) Signal sequences of EGL-20, PAT-33, and their mutants with higher  
494 hydrophobicity. The hydrophobicity was calculated by the  $\Delta G$  prediction server v1.0  
495 (<https://dgpred.cbr.su.se/index.php?p=TMpred>).  
496 (H) Western blot showing translocation efficiency of signal sequences in (G), assessed  
497 by the glycosylated band over Actin. DHFR is to generate a protein at suitable size.  
498 Opsin tag is a glycosylation reporter for protein entry into the ER (Judith Buentzel,  
499 2017). Data are presented as mean  $\pm$  SEM. \*\*,  $P < 0.01$ ; ns, not significant (Tukey's  
500 multiple comparisons test).

501

502 **Figure 5. P5A-ATPases function conservatively to regulate Wnt biogenesis.**

503 (A) Western blot of transfected WNT1 in control, *ATP13A1* KO, and *ATP13A1* KO  
504 cells with *ATP13A1* overexpression. Data are presented as mean  $\pm$  SEM. \*,  $P < 0.05$ ;  
505 \*\*\*,  $P < 0.001$  (Tukey's multiple comparisons test).  
506 (B) Western blot of transfected WNT1SS-FLAG-DHFR-Opsin in control, *ATP13A1*  
507 KO, and *ATP13A1* KO cells with *ATP13A1* overexpression. Data are presented as  
508 mean  $\pm$  SEM. \*,  $P < 0.05$ ; ns, not significant (Tukey's multiple comparisons test).

509 (C) Western blot showing proximal labeling of WNT1SS-FLAG-DHFR-Opsin by  
510 PafA-ATP13A1. Asterisk indicates Biotin-PupE labeled  
511 WNT1SS-FLAG-DHFR-Opsin.

512

513 **Figure S1. *catp-8* Is Required for PVM and SDQL Migration, Related to Figure**  
514 **1.**

515 (A) Representative images of PVM positions in WT and *catp-8(yan22)*. PVM neurons  
516 were labeled by a fluorescent marker *zdis5[Pmec-4::gfp]*. Scale bar, 50  $\mu$ m.

517 (B) Quantifications of PVM positions in (A). Data are presented as mean  $\pm$  SEM. N  
518 numbers are shown in the brackets. \*\*\*\*,  $P < 0.0001$  (One-sided ANOVA with the  
519 Tukey correction).

520 (C) Representative images of SDQL positions in WT and *catp-8(yan22)*. SDQL  
521 neurons were labeled by a fluorescent marker *Ex[Pgcy-35::mcherry]*. Scale bar, 50  
522  $\mu$ m.

523 (D) Quantifications of SDQL positions in (C). Data are presented as mean  $\pm$  SEM. N  
524 numbers were shown in the brackets. \*\*\*\*,  $P < 0.0001$  (One-sided ANOVA with the  
525 Tukey correction).

526

527 **KEY RESOURCES TABLE**

| <b>REAGENT or RESOURCE</b>                               | <b>SOURCE</b>                      | <b>IDENTIFIER</b>                                                             |
|----------------------------------------------------------|------------------------------------|-------------------------------------------------------------------------------|
| <b>Antibodies</b>                                        |                                    |                                                                               |
| Mouse anti-FLAG                                          | Sigma                              | Cat# F1804;<br>RRID:AB_262044                                                 |
| Mouse anti-GFP                                           | Abmart                             | Cat# M20004;<br>RRID:AB_2619674                                               |
| Rabbit anti-ATP13A1                                      | Proteintech                        | Cat# 16244-1-AP;<br>RRID:AB_10015282                                          |
| Donker anti-Rabbit                                       | Jackson<br>ImmunoResearch          | Cat# 711-035-152;<br>RRID:AB_10015282                                         |
| Rabbit anti-Mouse                                        | Sigma                              | Cat# A9044;<br>RRID:AB_258431                                                 |
| Rabbit anti-b-Actin                                      | Marine<br>Biological<br>Laboratory | Cat# PM053-7;<br>RRID:AB_10697035                                             |
| <b>Bacterial and Virus Strains</b>                       |                                    |                                                                               |
| OP50                                                     | CGC                                | <a href="https://www.cgc.edu/strain/OP50">https://www.cgc.edu/strain/OP50</a> |
| <b>Chemicals, Peptides, and Recombinant Proteins</b>     |                                    |                                                                               |
| KOD-Plus-Neo                                             | TOYOBO                             | Cat# KOD-401                                                                  |
| KOD One™ PCR Master Mix                                  | TOYOBO                             | Cat# KMM-101                                                                  |
| Experimental Models: Cell Lines                          |                                    |                                                                               |
| HEK293FT                                                 | ATCC                               | RRID:CVCL_6911                                                                |
| <b>Experimental Models: Organisms/Strains</b>            |                                    |                                                                               |
| <i>C. elegans</i> strain, see Table S1                   | This paper                         | N/A                                                                           |
| <b>Oligonucleotides</b>                                  |                                    |                                                                               |
| see Table S2                                             | This paper                         | N/A                                                                           |
| <b>Recombinant DNA</b>                                   |                                    |                                                                               |
| Plasmid: <i>pDDI22</i>                                   | Addgene                            | RRID:Addgene_47550                                                            |
| Plasmid: <i>pDDI62</i>                                   | Addgene                            | RRID:Addgene_47549                                                            |
| Plasmid: <i>Pgcy-32::mcherry</i>                         | This paper                         | N/A                                                                           |
| Plasmid: <i>Pgcy-35::mcherry</i>                         | This paper                         | N/A                                                                           |
| Plasmid: <i>Pcatp-8::catp-8</i>                          | This paper                         | N/A                                                                           |
| Plasmid: <i>Pegl-17::catp-8</i>                          | This paper                         | N/A                                                                           |
| Plasmid: <i>Pspn-1::catp-8]</i>                          | This paper                         | N/A                                                                           |
| Plasmid: <i>Pegl-20::catp-8</i>                          | This paper                         | N/A                                                                           |
| Plasmid: <i>Pegl-20::nls::mcherry</i>                    | This paper                         | N/A                                                                           |
| Plasmid:<br><i>Ptoe-2::loxp::stop::loxp::gfp::catp-8</i> | This paper                         | N/A                                                                           |
| Plasmid: <i>Pegl-20::nls::CRE</i>                        | This paper                         | N/A                                                                           |
| Plasmid: <i>Pegl-17::nls::CRE</i>                        | This paper                         | N/A                                                                           |

|                                                            |            |     |
|------------------------------------------------------------|------------|-----|
| Plasmid: <i>Pegl-20::egl-20</i>                            | This paper | N/A |
| Plasmid:<br><i>Prpl-28::egl-20SS::gfp::Gly::FLA<br/>G</i>  | This paper | N/A |
| Plasmid:<br><i>Prpl-28::cwn-1::gfp::Gly::FLAG</i>          | This paper | N/A |
| Plasmid: <i>pEGFP.C1-egl-20::gfp</i>                       | This paper | N/A |
| Plasmid: <i>pEGFP.C1-cwn-1::gfp</i>                        | This paper | N/A |
| Plasmid: <i>pEGFP.C1-lin-44::gfp</i>                       | This paper | N/A |
| Plasmid: <i>pEGFP.C1-cwn-2::gfp</i>                        | This paper | N/A |
| Plasmid: <i>pEGFP.C1-mom-5::gfp</i>                        | This paper | N/A |
| Plasmid:<br><i>pEGFP.C1-WNTISS::FLAG::DH<br/>FR::Opsin</i> | This paper | N/A |
| Plasmid:<br><i>pEGFP.C1-WNT1::FLAG::Opsin</i>              | This paper | N/A |

528

## 529 **EXPERIMENTAL MODEL AND SUBJECT DETAILS**

### 530 **Experimental Materials**

531 *C. elegans* strains were cultured and maintained as described (Brenner, 1974). Details  
532 and a complete list of strains in this study are shown in Table S1. The HEK293FT cell  
533 line was obtained from ATCC (American Type Culture Collection).

534

## 535 **METHOD**

### 536 **Molecular Biology and Transgenesis**

537 We used standard molecular biology techniques for cloning and plasmid construction.  
538 Most of the plasmid constructs were generated in pSM vector backbone, more details  
539 see Key Resources Table. Germline transformation of *C. elegans* was performed using  
540 standard techniques (Mello and Fire, 1995). The co-injection marker plasmid and the  
541 concentration are as follows, *pCFJ104* at 5 ng/μl, *pCFJ90* at 2.5 ng/μl, *odr-1::gfp* at  
542 60 ng/μl, or *odr-1::rfp* at 60 ng/μl.

543

### 544 **Scoring Migration Defects of QL Neuroblast Descendants**

545 PQR was assayed using *lqls58[gcy-32::cfp]* in L4 animals. PVM and AVM were  
546 visualized with *zdIs5[Pmec-4::gfp]*. SDQL was assayed using extrachromosomal

547 arrays *Pgcy-35::mcherry*. Migration defects in QL neuroblast descendants (PQR,  
548 PVM, SDQL) depend on neuron positions in worm. We quantified the neuron position  
549 in L4 or young adult animals. We chose never ring, vulva and anus as fiduciary  
550 markers. The relative position of PQR is calculated as the distance between never ring  
551 and PQR divided by the distance between never ring and anus. The relative positions  
552 of SDQL and PVM are calculated as the distance between SDQL or PVM and vulva  
553 divided by the distance between never ring and anus, neurons posterior to vulva are  
554 calculated as positive values and neurons anterior to vulva are calculated as negative  
555 values respectively.

556

### 557 **Imaging**

558 Detail imaging procedures were performed as described (Wang et al., 2021) with  
559 slight modifications as follows. Animals were anesthetized with 5 mmol/L levamisole  
560 in M9 buffer, and then mounted on 2% (w/v) agarose pads. PQR neuron in L4 animal  
561 was visualized with *lqls58[pcy-32::gfp]* and imaged using OLYMPUS BX53  
562 fluorescent microscope with a UPlanSApo 20x/0.75 objective. The CellSens software  
563 is used to process the image. To analyze the position of other neurons,  
564 *zdl5[Pmec-4::gfp]* marked AVM and PVM in L2 animals, extrachromosomal arrays  
565 (*Pgcy-35::mcherry*) marked SDQL in L4 animals, we used a Nikon Spinning Disk  
566 confocal microscope (TI2+CSU+W1) with Photometrics Prime 95B camera, W1  
567 spinning disk head, the 488/561 nm excitation laser and a 60x/1.40 N.A oil immersion  
568 objective. Maximum-intensity projections were generated using ImageJ (NIH).

569 To image the fluorescent marker strains *rdvIs1[Pegl-17::mcherry]*, *mulS16*  
570 [*mab-5::GFP*], *ki[gfp::catp-8]*, *mulS49[egl-20::GFP]*, and transgenic arrays  
571 *Pegl-20::nls::mcherry*, we used Zeiss Axio Observer Z1 microscope (Carl Zeiss)  
572 equipped with an alpha Plan-Apochromat 63x/1.46 NA objective. ImageJ software  
573 (NIH) was used to process the images.

574

### 575 **Time-Lapses Imaging of Neuronal Migration**

576 *C. elegans* L1 larvae were anesthetized with 2.5 mmol/L levamisole in M9 buffer, and

577 then mounted on 2% (w/v) agarose pads. Slides were sealed with 2:1  
578 vaseline/paraplast tissue embedding medium. Images were acquired using a Zeiss  
579 Axio Observer Z1 microscope (Carl Zeiss) equipped with an alpha Plan-Apochromat  
580 63x/1.46 NA objective, Yokogawa camera adapter, 561 nm laser and Hamamatsu  
581 camera. QL neuroblast migration was visualized using *rdvIs1[Pegl-17::mCherry]*, a  
582 stack at 1 um intervals with mCherry exposure time of 3.5 s at every 15 min. ImageJ  
583 software (NIH) was used to process the images.

584

### 585 **CRISPR/Cas9-Mediated Genomic Editing**

586 To generate *yan125* mutant by CRISPR/Cas9 as described (Dickinson et al., 2013),  
587 *Peft-3::cas9* (50 ng/μl), *U6::egl-20-sg#1* (25 ng/μl, target  
588 sequence:5'-TATTTGTTCTCCTCGTTTA-3'), *U6::egl-20-sg#2* (25 ng/μl, target  
589 sequence:5'-AAACTTACAGCCAGTTATA-3') and *pCFJ104* (5 ng/μl) were injected  
590 into N2 strain. F1 worms were screened for successful knock-out by PCR. F2 worms  
591 were cloned out without co-injection marker, genotyped by PCR, and sequenced to  
592 confirm.

593 To replace EGL-20 (1-18 aa) signal sequence with PAT-3 (1-20 aa) signal  
594 sequence, coding sequence of PAT-3 signal sequence was inserted in *pSM-egl-20*  
595 vector via long primers. Two homologous arms were 679 bp (5'-arm) and 654 bp  
596 (3'-arm) respectively. Repair template (50 ng/μl), *U6::egl-20-sg#1* (25 ng/μl),  
597 *U6::egl-20-sg#2* (25 ng/μl), *pCFJ104* (5 ng/μl) were injected into *catp-8(yan22)*. F1  
598 worms were screened for successfully insertion using PCR, F2 worms without  
599 co-injection marker were cloned out, genotyped by PCR, and verified by sequencing.

600 To rescue the PQR migration defects in *catp-8(yan22)*, a single copy insertion of  
601 *yanTi9[Pcatp-8::catp-8]* was generated by CRISPR-Cas9 in *catp-8(yan22)*. The  
602 promoter of *catp-8* from N2 genomic DNA and *catp-8* cDNA were amplified and  
603 inserted in *ttTi5605* vector. Repair template (50 ng/μl), *pDD122* (50 ng/μl), *pCFJ104*  
604 (5 ng/μl) and *pCFJ90* (2.5 ng/μl) were injected into *catp-8(yan22)*. F1 worms were  
605 screened for successfully insertion using PCR. F2 worms without co-injection marker  
606 were cloned out, genotyped by PCR and confirmed by sequencing.

607

## 608 **Western Blot**

609 We synchronized early L1 larvae by hatching them in M9 buffer, and resuming  
610 feeding on regular OP50 NGM plates till they grow to L4 stage. Worms were  
611 harvested and washed for three times with M9 buffer, and the pellet was lysed in  
612 Laemmli sample buffer (32.9 mM Tris-HCl, pH 6.8, 13.2% glycerol, 1.05% SDS, 2.5%  
613 2-mercaptoethanol and 0.005% bromophenol blue). Pellets were repeatedly boiled for  
614 5 min and then vortexed for 1 min, until most of the worms were broken. The lysates  
615 were spun at 13,000 rpm for 10 min at 4°C. Then supernatants were collected and  
616 analyzed using western blots with mouse monoclonal anti-GFP (1:1000, Abmart),  
617 Anti- $\beta$ -Actin pAb-HRP-Direct (1:5000, Medical & Biological Laboratories) and  
618 HRP-conjugated Rabbit antibody to mouse (1:10,000, Sigma).

619 Plasmids were transfected into control or ATP13A1 KO cells, and then cell  
620 lysates were extracted by NP40 lysis buffer (150 mM NaCl, 0.5% NP40 and 50 mM  
621 Tris-HCl pH 7.4, 1mM EDTA, 10% glycerol) containing 1% Protease Inhibitor stock  
622 (Bimake) for 30 min on ice. The soluble fraction of the cell lysates was isolated via  
623 centrifugation at 12,000 rpm for 10 min at 4°C. Laemmli sample buffer was added to  
624 the supernatant. Then the samples were heated at 65°C for 10 min, resolved via  
625 SDS-PAGE gel electrophoreses, and analyzed using Western blot with the rabbit  
626 polyclonal anti-ATP13A1 (1:2000, proteintech), mouse anti-FLAG (1:1000, sigma),  
627 HRP-conjugated donkey anti-rabbit (1:10000, Jackson ImmunoResearch), and  
628 HRP-conjugated Rabbit antibody to mouse (1:30,000, Sigma).

629

## 630 **Real-Time RT-PCR**

631 We synchronized L1 larvae by bleaching adult animals to obtain eggs to hatch on  
632 NGM plate with OP50. L1 worm was collected and lysed in 1 mL Trizol reagent  
633 (Vazyme) by freeze and thaw. Total RNA extraction was followed by  
634 reverse-transcription with random primers and HiScript II Q RT SuperMix for qPCR  
635 (Vazyme). Relative abundance of *egl-20* and actin was quantified with real-time PCR  
636 using TB Green Premix Ex TaqII (Tli RNase H Plus, Takara).

637

638 **Statistical Analysis**

639 Quantification of neuron (PQR, PVM, SDQL) positions along the anterior-posterior

640 axis of the worm body was One-way ANOVA followed by Tukey's multiple

641 comparisons test (Prism; GraphPad Software). For western blot, ImageJ Software

642 (NIH) was used to analyze the grayscale values from three biological repeats.

643 Statistical comparisons were conducted using Tukey's multiple comparisons test.

644 Statistical significance is indicated as n.s., not significant; \*,  $P < 0.05$ ; \*\*,  $P < 0.01$ ;

645 \*\*\*,  $P < 0.001$ ; \*\*\*\*,  $P < 0.0001$ .



A

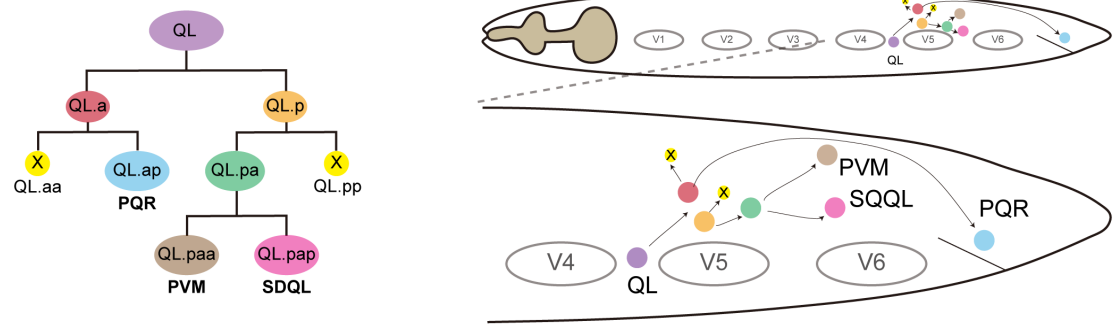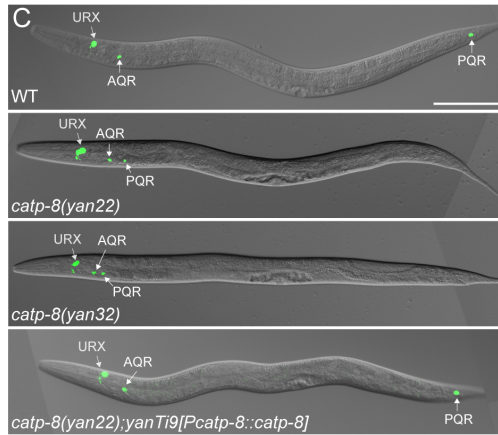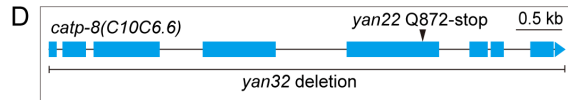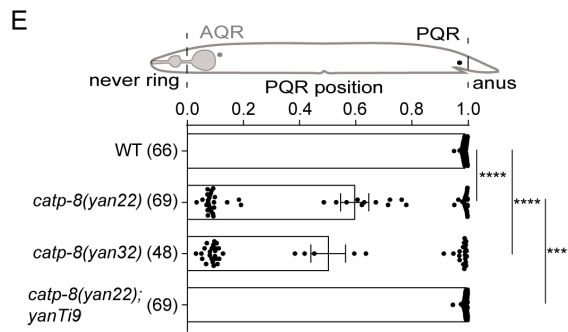

F

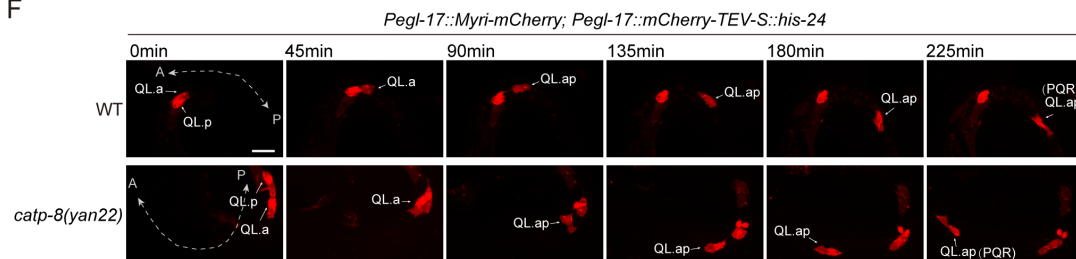

Figure 1

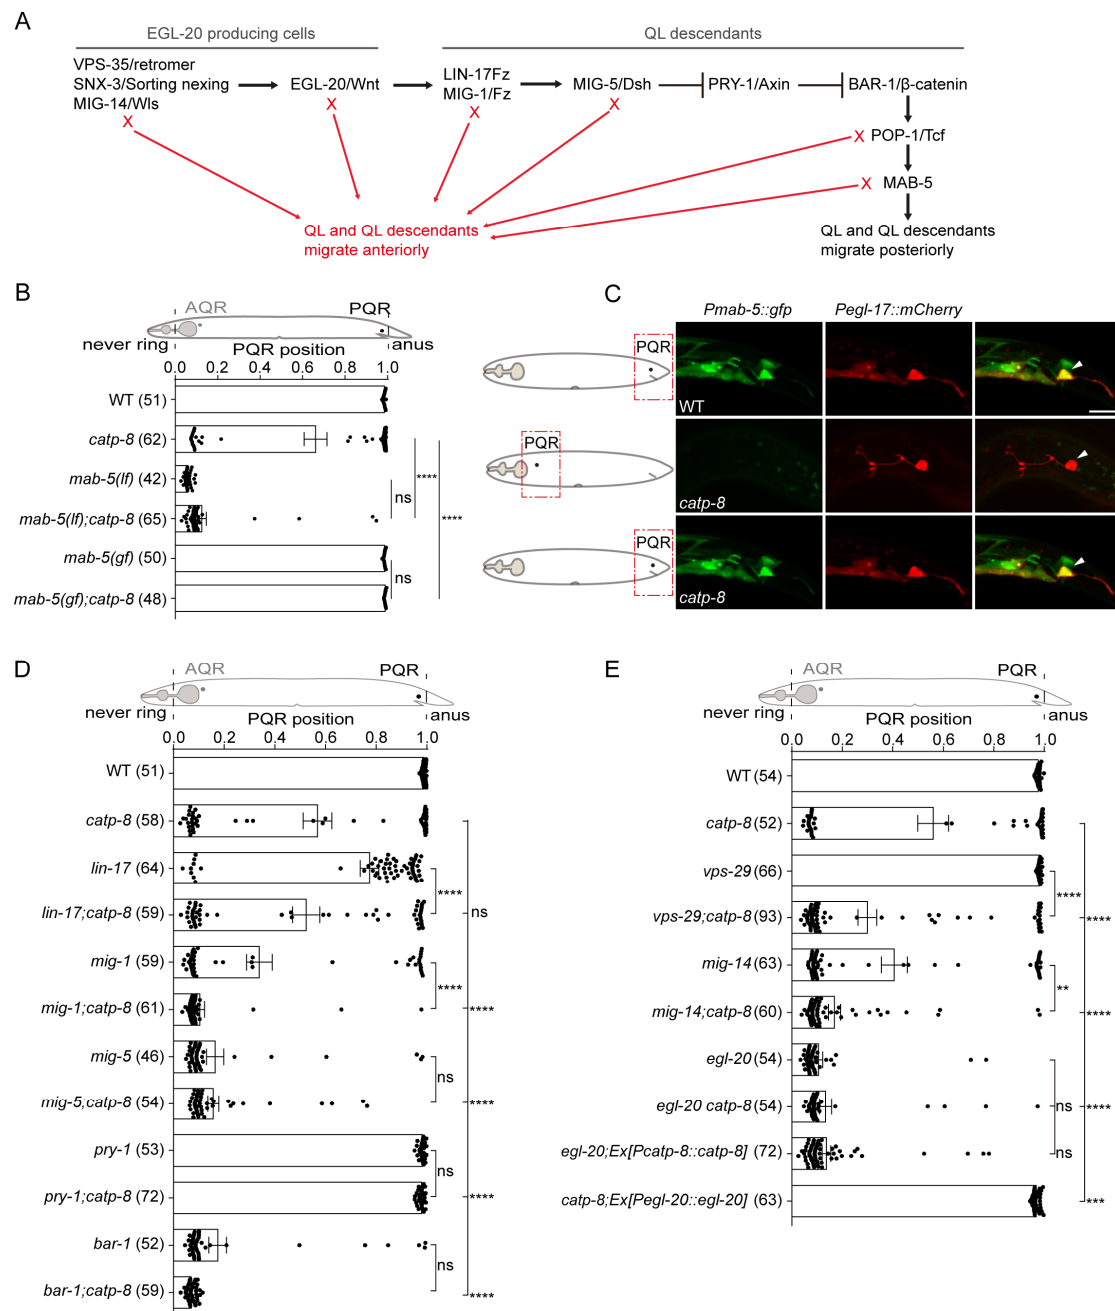

**Figure 2**

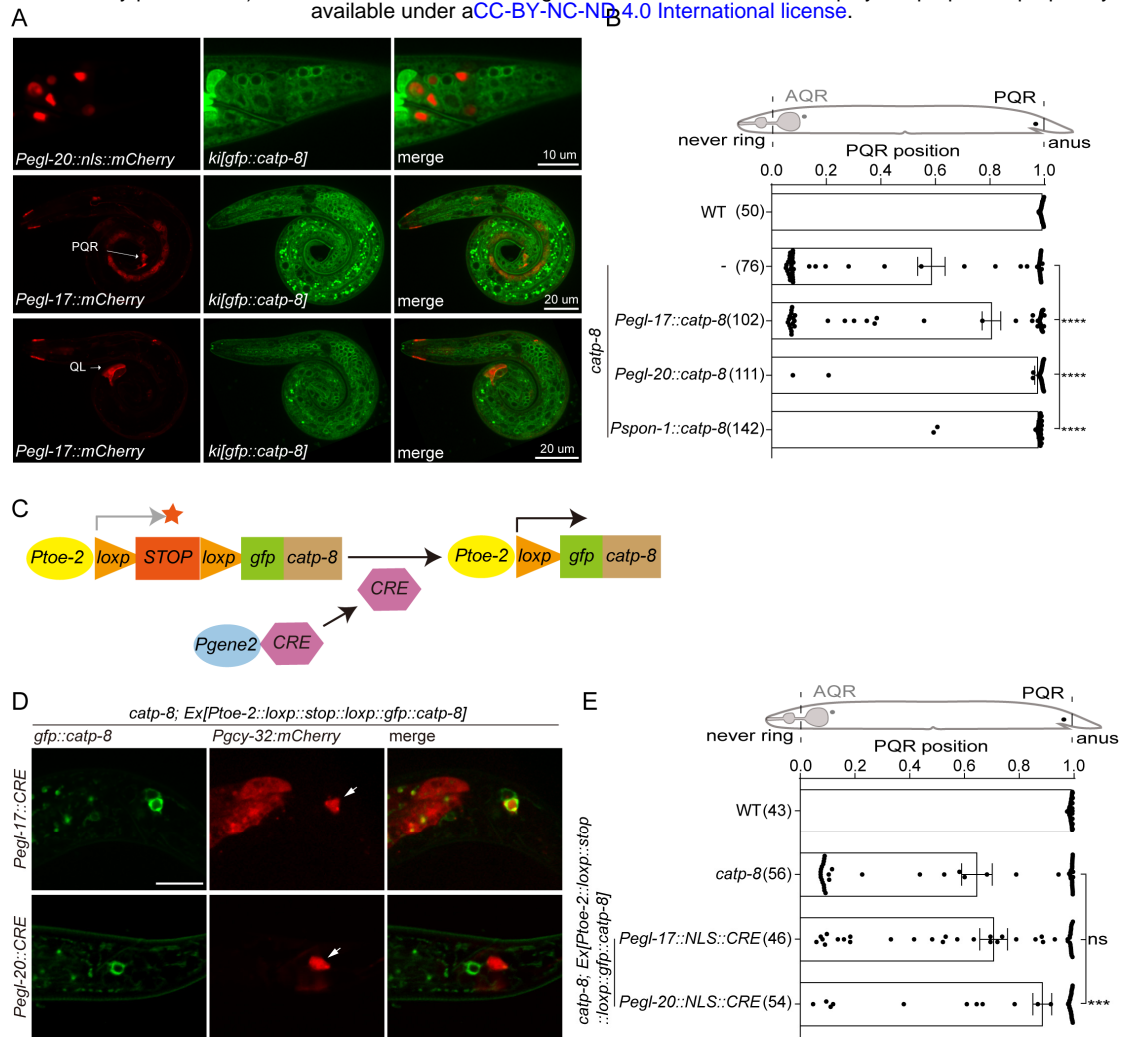

**Figure 3**

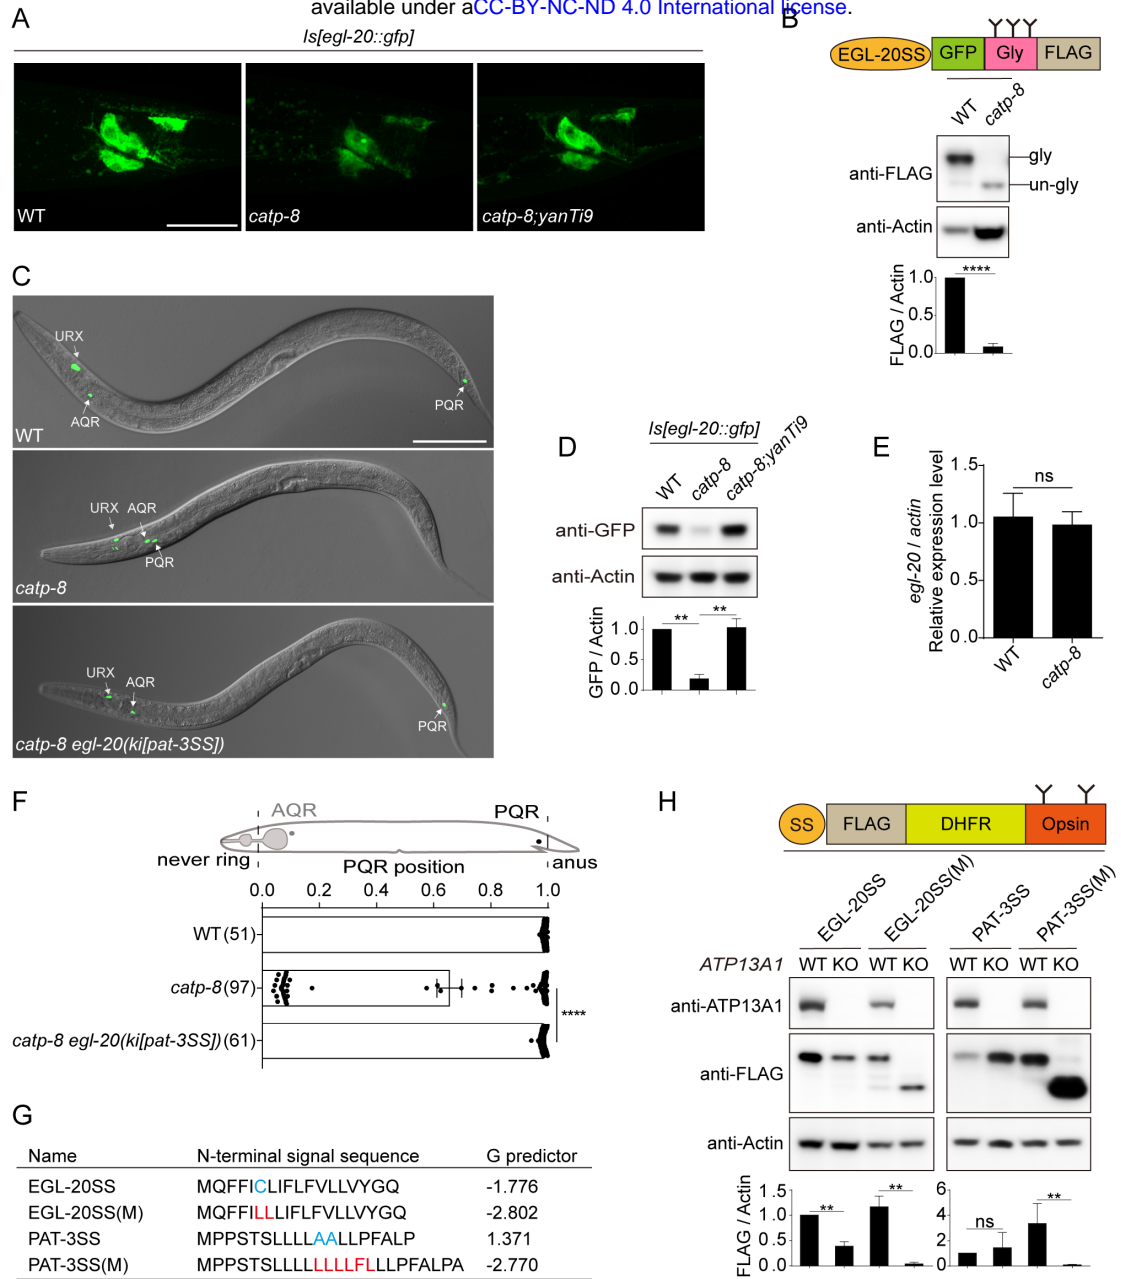

**Figure 4**

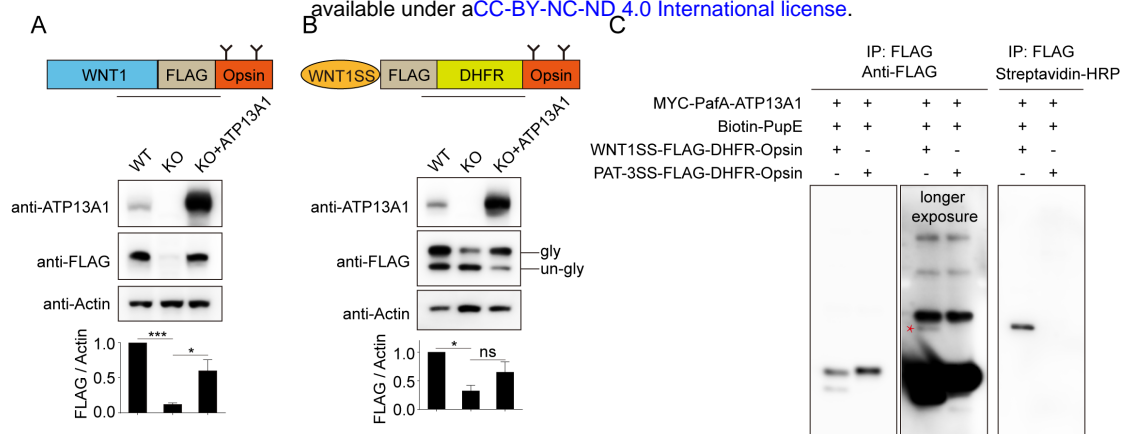

**Figure 5**

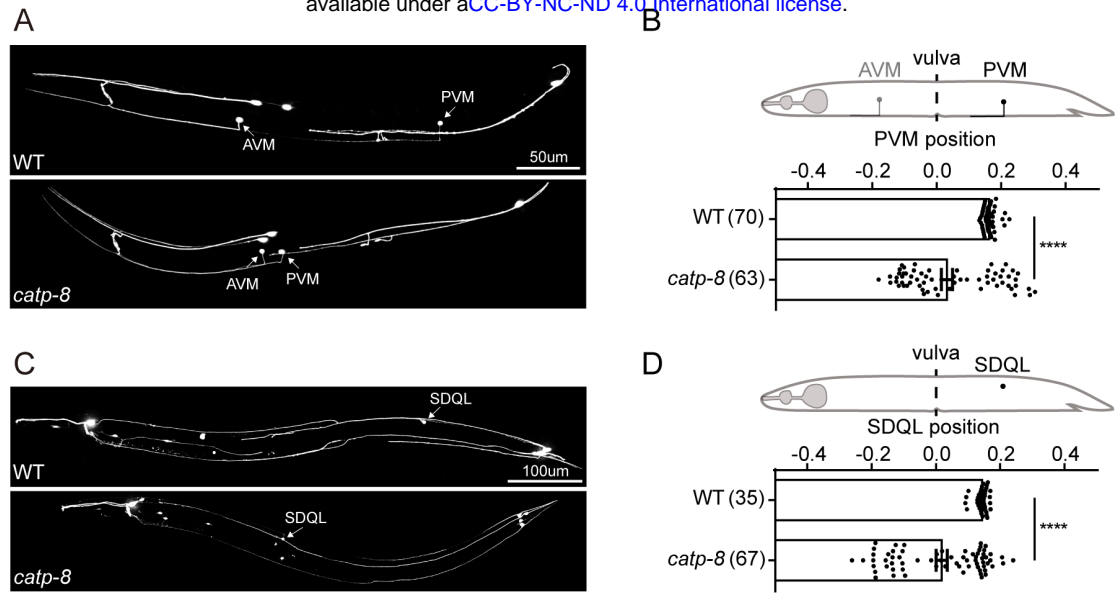

**Figure S1**
